# Supplementary material for: RZZ‐Spindly and CENP‐E form an integrated platform to recruit dynein to the kinetochore corona
Source: PubMed Central journal article supplement (PMC10711656; doi:10.15252/embj.2023114838), 2023-11-20
Supplement: EMBJ-42-e114838-s004.pdf [file EMBJ-42-e114838-s004.pdf]

## **\*Appendix\***

RZZ-Spindly and CENP-E form an integrated platform to recruit  
Dynein to the kinetochore corona

By Verena Cmentowski et al.

Including Appendix Figures S1 to S4 and their legends

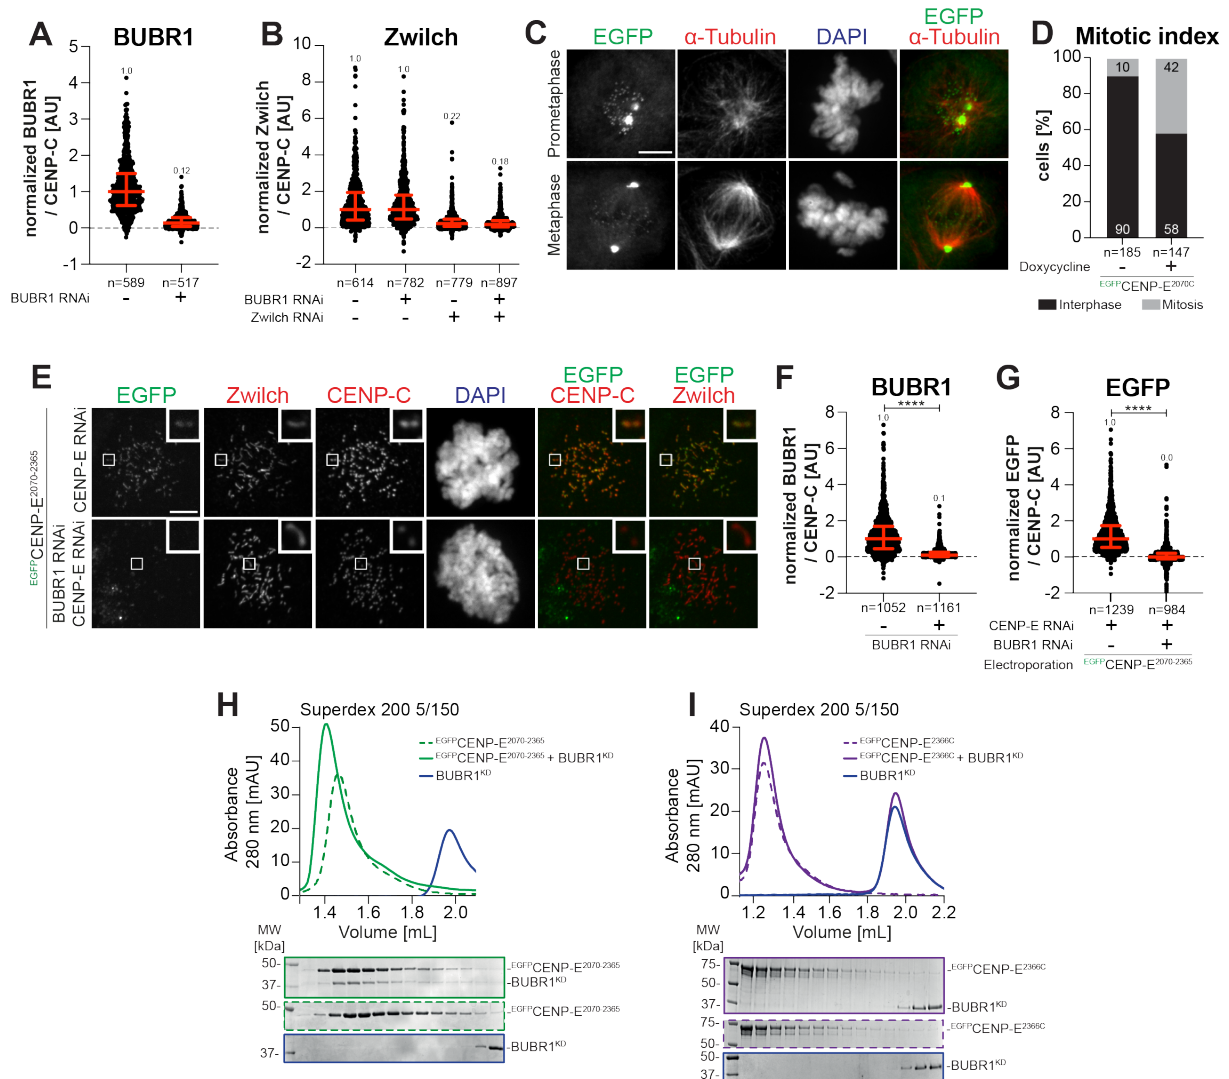

## Appendix Figure S1

(A-B) Quantification of BUBR1 and Zwilch levels of cells treated as shown in Figure 1C-D. n refers to individually measured kinetochores. Red bars represent median and interquartile range. (C) Representative images showing the localization of EGFP-CENP-E<sup>2070C</sup> in prometaphase and metaphase stable DLD-1 cells. 32 h after cells were seeded, protein expression was induced through addition of 300 ng/mL doxycycline for 16 h before fixation. CENP-C was used to visualize kinetochores and DAPI to stain DNA. Scale bar: 5  $\mu$ m. (D) Mitotic index analysis of a stable DLD-1 cell line expressing EGFP-CENP-E<sup>2070C</sup>. 32 h after seeding, cells were treated with 300 ng/mL doxycycline or DMSO for 16 h before fixation. n refers to the number of analyzed cells. (E) Representative images showing the localization of EGFP-CENP-E<sup>2070-2365</sup> in prometaphase in presence or absence of BUBR1. BUBR1 RNAi treatment was performed with 100 nM siRNA and CENP-E RNAi treatment with 60 nM siRNA. 13 h after CENP-E and BUBR1 RNAi treatment HeLa cells were electroporated with recombinant EGFP-CENP-E<sup>2070-2365</sup>. Following an 8 h recovery, cells were synchronized in G2 phase with 9  $\mu$ M RO3306 for 15 h and then released into mitosis. Subsequently, cells were immediately treated with 3.3  $\mu$ M Nocodazole for an additional hour. CENP-C was used to visualize kinetochores and DAPI to stain DNA. Scale bar: 5  $\mu$ m. (F-G) Quantification of BUBR1 and EGFP levels at kinetochores of the experiment shown in panel E. n refers to individually measured kinetochores. Statistical analysis was performed with a nonparametric t test comparing two unpaired groups (Mann-Whitney test). Symbols indicate: n.s. =  $p > 0.05$ , \* =  $p \leq 0.05$ , \*\* =  $p \leq 0.01$ , \*\*\* =  $p \leq 0.001$ , \*\*\*\* =  $p \leq 0.0001$ . Red bars represent median and interquartile range. (H-I) Analytical SEC binding assays between the BUBR1 kinase domain (KD) and different EGFP-CENP-E constructs. The profile of the complex is represented as a continuous line, and the individual CENP-E constructs with a dashed line. BUBR1: 8  $\mu$ M, CENP-E constructs: 16  $\mu$ M.

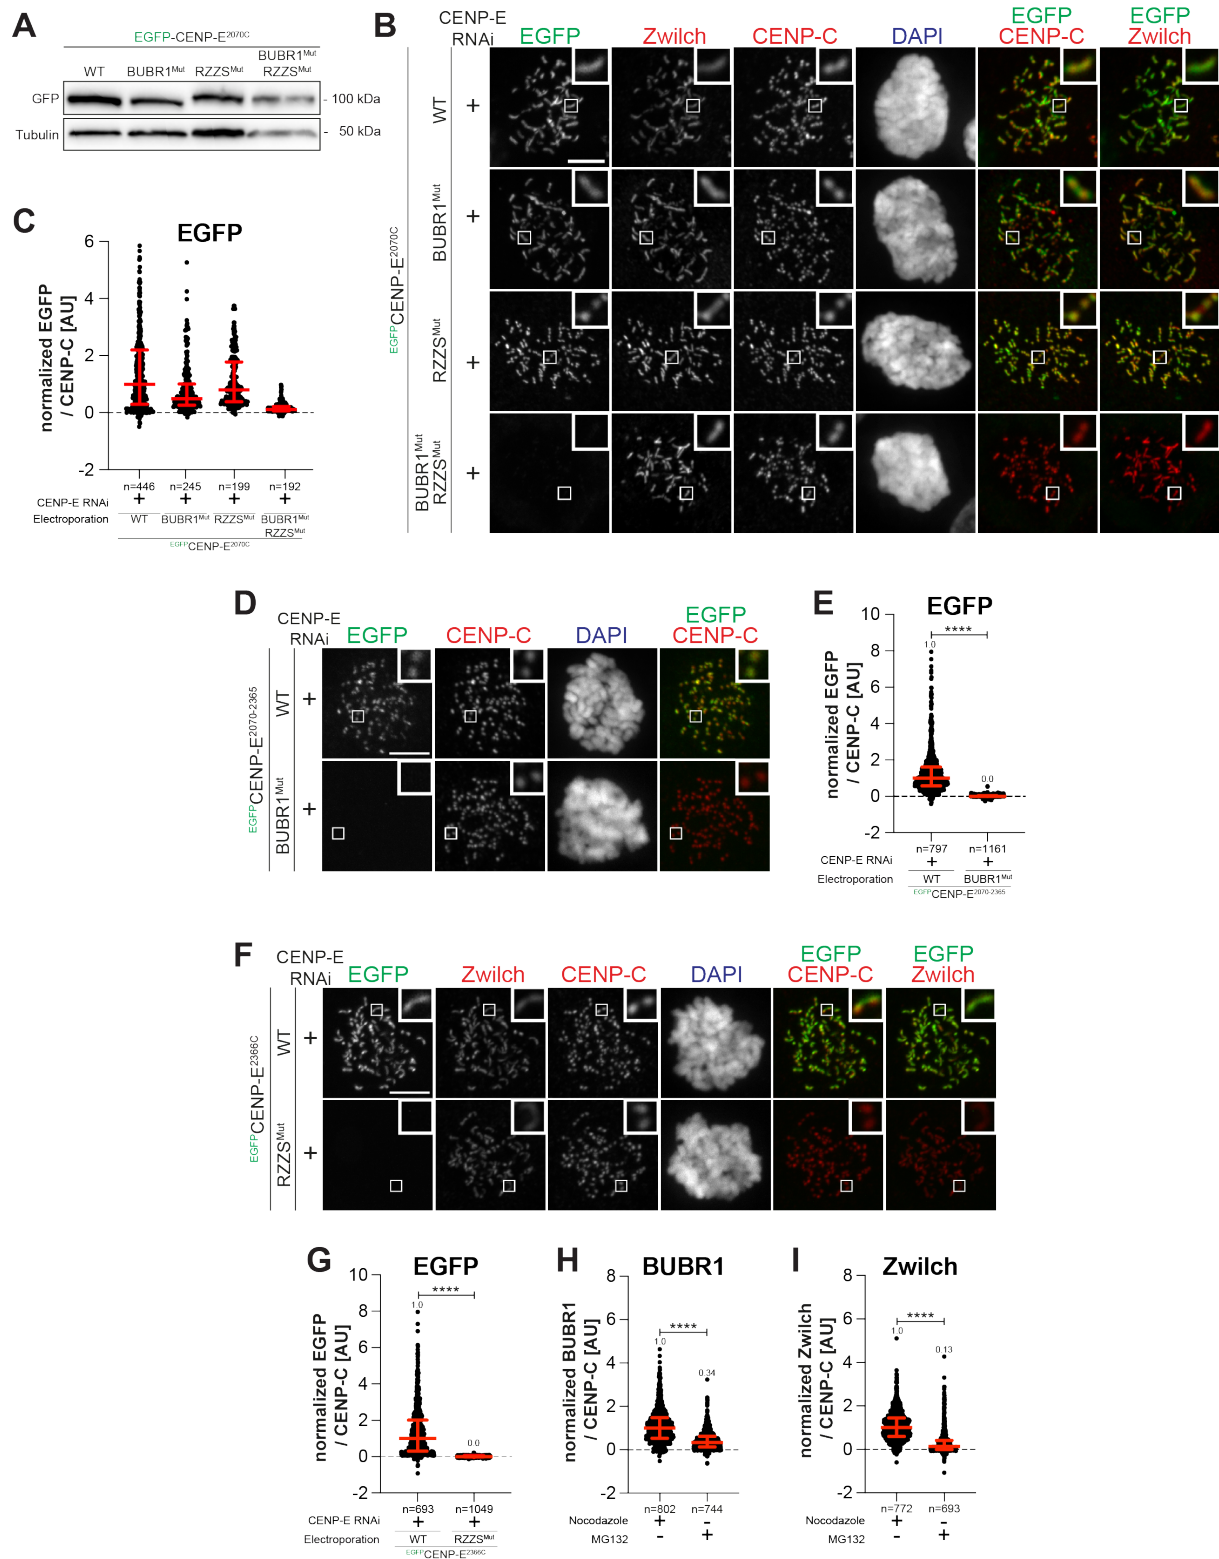

## Appendix Figure S2

(A) Immunoblot of mitotic DLD-1 cells stably expressing different  $EGFP^{CENP-E^{2070C}}$  constructs, treated as shown in (Figure 2D) and probed with the indicated antibodies. 50  $\mu$ g of cleared lysate was used for each

condition, and Tubulin is shown as a loading control. **(B)** Representative images showing the localization of different  $^{EGFP}CENP-E^{2070C}$  constructs in prometaphase after depletion of CENP-E with 60 nM siRNA. 13 h after RNAi treatment HeLa cells were electroporated with recombinant  $^{EGFP}CENP-E^{2070C}$  constructs as indicated. Following an 8 h recovery, cells were synchronized in G2 phase with 9  $\mu$ M RO3306 for 15 h and then released into mitosis. Subsequently, cells were immediately treated with 3.3  $\mu$ M Nocodazole for an additional hour. CENP-C was used to visualize kinetochores and DAPI to stain DNA. Scale bar: 5  $\mu$ m. **(C)** Quantification of EGFP levels at kinetochores of the experiment shown in panel B. n refers to individually measured kinetochores. Red bars represent median and interquartile range. **(D)** Representative images showing the localization of different  $^{EGFP}CENP-E^{2070-2365}$  constructs in prometaphase after depletion of CENP-E with 60 nM siRNA. 13 h after RNAi treatment HeLa cells were electroporated with recombinant  $^{EGFP}CENP-E^{2070-2365}$  constructs as indicated. Following an 8 h recovery, cells were synchronized in G2 phase with 9  $\mu$ M RO3306 for 15 h and then released into mitosis. Subsequently, cells were immediately treated with 3.3  $\mu$ M Nocodazole for an additional hour. CENP-C was used to visualize kinetochores and DAPI to stain DNA. Scale bar: 5  $\mu$ m. **(E)** Quantification of EGFP levels at kinetochores of the experiment shown in panel D. n refers to individually measured kinetochores. Statistical analysis (also for H-I) was performed with a nonparametric t test comparing two unpaired groups (Mann–Whitney test). Symbols indicate: n.s. =  $p > 0.05$ , \* =  $p \leq 0.05$ , \*\* =  $p \leq 0.01$ , \*\*\* =  $p \leq 0.001$ , \*\*\*\* =  $p \leq 0.0001$ . Red bars represent median and interquartile range. **(F)** Representative images showing the localization of different  $^{EGFP}CENP-E^{2366C}$  constructs in prometaphase after depletion of CENP-E with 60 nM siRNA. 13 h after RNAi treatment HeLa cells were electroporated with recombinant  $^{EGFP}CENP-E^{2366C}$  constructs as indicated. Following an 8 h recovery, cells were synchronized in G2 phase with 9  $\mu$ M RO3306 for 15 h and then released into mitosis. Subsequently, cells were immediately treated with 3.3  $\mu$ M Nocodazole for an additional hour. CENP-C was used to visualize kinetochores and DAPI to stain DNA. Scale bar: 5  $\mu$ m. This experiment is part of a larger experiment where we also compared DMSO-treated with Reversine-treated cells. Both samples shown here were treated with DMSO (see Methods). The WT control row is also displayed in [Figure EV2E](#). **(G)** Quantification of EGFP levels at kinetochores of the experiment shown in panel F. n refers to individually measured kinetochores. Red bars represent median and interquartile range. **(H-I)** Comparison of BUBR1 and Zwilch levels at kinetochores in Nocodazole and MG132 arrested cells. n refers to individually measured kinetochores.

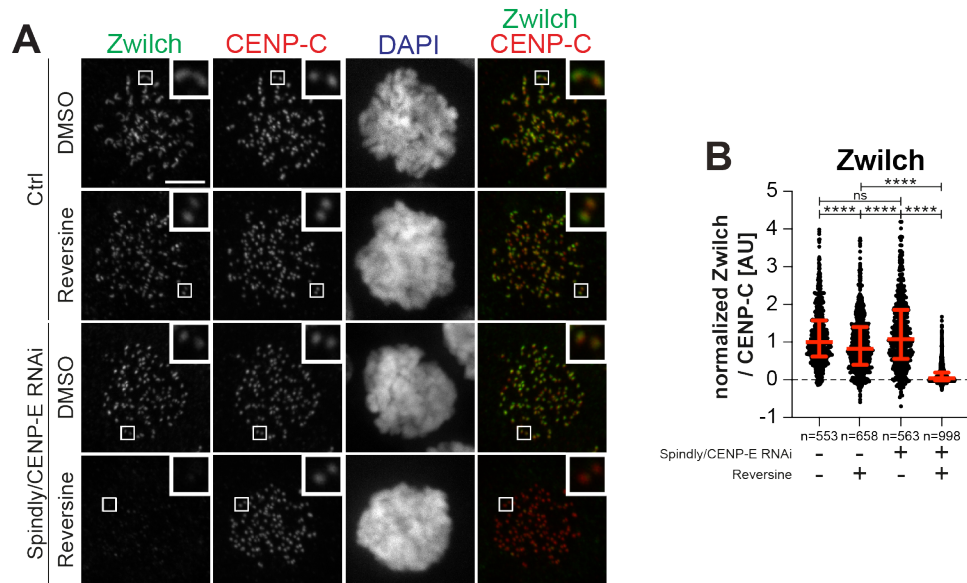

### Appendix Figure S3

(A) Representative images showing kinetochore levels of Zwilch after depletion of Spindly and CENP-E. Spindly RNAi treatment was performed with 50 nM siRNA. 24 h after Spindly RNAi treatment, HeLa cells were transfected with 60 nM CENP-E siRNA. 8 h after transfection, cells were synchronized in G2 phase with 9  $\mu$ M RO3306 for 15 h and then released into mitosis. Subsequently, cells were immediately treated with 3.3  $\mu$ M Nocodazole, 10  $\mu$ M MG132 and, where indicated, with 500 nM Reversine, for an additional hour. CENP-C was used to visualize kinetochores and DAPI to stain DNA. Scale bar: 5  $\mu$ m. (B) Quantification of Zwilch levels at kinetochores of the experiment shown in panel A. n refers to individually measured kinetochores. Statistical analysis was performed with a nonparametric t test comparing two unpaired groups (Mann–Whitney test). Symbols indicate: n.s. =  $p > 0.05$ , \* =  $p \leq 0.05$ , \*\* =  $p \leq 0.01$ , \*\*\* =  $p \leq 0.001$ , \*\*\*\* =  $p \leq 0.0001$ . Red bars represent median and interquartile range.

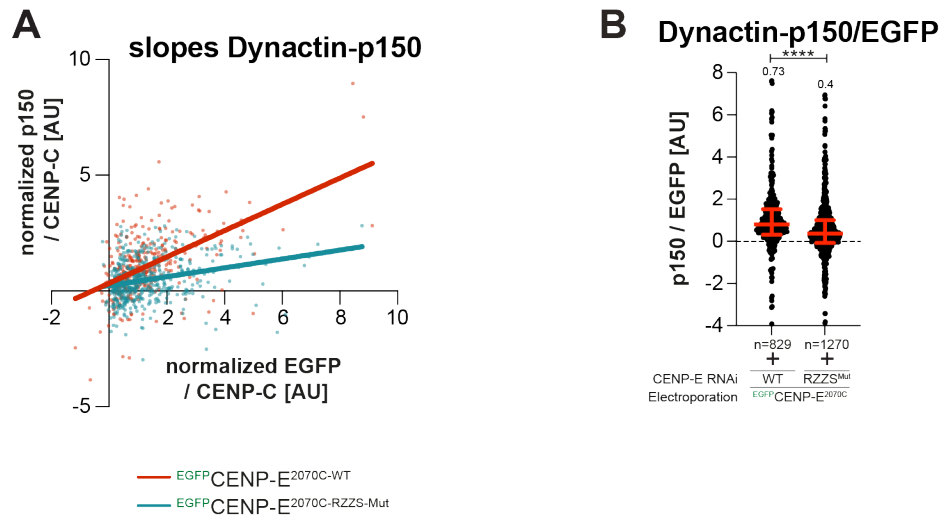

### Appendix Figure S4

(A) Linear fitting through the distribution of data points reporting for each kinetochore the CENP-C-normalized EGFP-CENP-E intensity on the x-axis and the CENP-C-normalized Dynactin-p150 intensity on the y-axis from the experiment shown in Figure 5A-D. (B) Scatter dot plot of the ratio of CENP-C-normalized Dynactin-p150 intensity over CENP-C-normalized EGFP-CENP-E intensity from the experiment shown in Figure 5A-D. n refers to individually measured kinetochores. Statistical analysis was performed with a nonparametric t test comparing two unpaired groups (Mann-Whitney test). Symbols indicate: n.s. =  $p > 0.05$ , \* =  $p \leq 0.05$ , \*\* =  $p \leq 0.01$ , \*\*\* =  $p \leq 0.001$ , \*\*\*\* =  $p \leq 0.0001$ . Red bars represent median and interquartile range.
